# Supplementary material for: Performance-weighted ensemble learning for detecting patients with FTD and ALS from short reading tasks
Source: Research Square preprint supplement (doi:10.21203/rs.3.rs-7917087/v1), 2026-02-23
Supplement: Supplementary file 1 [file c7aa6234136eaa42ce7e0476.docx]

**Table S1.** Proportion (n, %) of correct classification by recorded location.

| Location | Correct, n | Error, n | total, n | Accuracy, % |
| --- | --- | --- | --- | --- |
| Nagoya | 116 | 24 | 140 | 0.829 |
| Osaka | 21 | 7 | 28 | 0.750 |
| Toyoake | 19 | 10 | 29 | 0.655 |
| total | 156 | 41 | 197 | 0.792 |

**Table S2.** Discrimination performance of each reading task (FTD and ALS vs. HC).

|  | No. | Speech Task (romaji, figure) | Sensitivity for each disease | | | | | Spec | Acc | macro-F1 |
| --- | --- | --- | --- | --- | --- | --- | --- | --- | --- | --- |
| FTD and ALS total | PNFA | bvFTD | SD | ALS |
| word | 1 | mado | 0.664 | 0.600 | 0.300 | 0.800 | 0.676 | 0.667 | 0.665 | 0.662 |
| 2 | paipu | 0.703 | 0.800 | **0.900** | 0.800 | 0.664 | 0.732 | 0.717 | 0.715 |
| 3 | denwa | 0.673 | 0.400 | 0.800 | 0.667 | 0.690 | 0.751 | 0.710 | 0.707 |
| 4 | nasu | 0.558 | 0.800 | 0.400 | 0.667 | 0.527 | 0.678 | 0.614 | 0.611 |
| 5 | banana | **0.730** | 0.800 | 0.700 | 0.933 | 0.689 | 0.666 | 0.701 | 0.698 |
| 6 | sanjuu-san (33) | 0.683 | 0.900 | 0.600 | 0.800 | 0.648 | 0.701 | 0.691 | 0.690 |
| 7 | yukidaruma | 0.606 | **1.000** | 0.500 | 0.667 | 0.553 | 0.688 | 0.645 | 0.644 |
| 8 | nijuu-go paasento (25%) | 0.684 | 0.700 | **0.900** | 0.800 | 0.636 | 0.784 | 0.731 | 0.730 |
| 9 | kyuujuu-ni bunno ichi (1/92) | 0.672 | **1.000** | 0.600 | 0.667 | 0.648 | 0.667 | 0.671 | 0.669 |
| sentence | 10 | denwa ga natte imasu. | 0.645 | 0.900 | 0.800 | 0.800 | 0.569 | 0.732 | 0.686 | 0.685 |
| 11 | sakana ya wa genki deshita. | 0.597 | 0.700 | 0.300 | 0.933 | 0.542 | 0.742 | 0.665 | 0.664 |
| 12 | ani wa mada modori masen. | 0.606 | 0.900 | 0.500 | 0.733 | 0.568 | 0.731 | 0.665 | 0.664 |
| 13 | nihon koukou yakyuu renmei. | 0.711 | 0.800 | 0.400 | **1.000** | 0.660 | 0.753 | 0.731 | 0.731 |
| 14 | dakedo, yappari, demo wa dame. | 0.548 | **1.000** | 0.200 | 0.733 | 0.501 | **0.796** | 0.665 | 0.661 |
| 15 | atarashii amazake wo go hon no hyoutan ni irenasai. | 0.720 | 0.900 | 0.400 | 0.867 | **0.699** | 0.782 | **0.751** | **0.747** |
| non-word | 16 | tokeienpitsu | 0.575 | 0.700 | 0.500 | 0.533 | 0.578 | 0.613 | 0.594 | 0.591 |

Results of the best performing task are highlighted in bold.

Spec, Specificity; Acc, Accuracy.

**Table S3.** Comparison of clinical features between the two groups based on correct and error classifications.

|  | FTD and ALS | | p - value | HC | | p - value |
| --- | --- | --- | --- | --- | --- | --- |
| variables | Correct, n=86 | Error, n=18 | Correct, n=70 | Error, n=23 |
| age | 67.6 (8.9) | 60.8 (13.8) | 0.042 | 67.7 (8.2) | 68.3 (10.4) | 0.577 |
| gender, M / F | 46 / 40 | 8 / 10 | 0.606 | 24 / 46 | 11 / 12 | 0.322 |
| education | 12.3 (2.4) | 11.9 (2.3) | 0.523 | 13.4 (2.2) | 13.6 (1.8) | 0.740 |
| MMSE | 23.9 (5.5) | 25.9 (5.1) | 0.047 | 28.9 (1.1) | 28.8 (1.1) | 0.672 |
| ACE-R | 75.1 (23.0) | 80.9 (20.8) | 0.287 | 95.8 (3.2) | 95.3 (3.4) | 0.501 |
| WAB, AQ | 85.7 (15.0) | 89.8 (11.6) | 0.170 | 97.1 (2.3) | 97.3 (2.6) | 0.392 |
| Spontaneous Speech (/20) | 16.9 (2.6) | 17.6 (2.7) | 0.121 | 19.2 (0.8) | 19.3 (1.0) | 0.252 |
| Auditory comprehension (/10) | 8.9 (1.6) | 9.1 (1.2) | 0.838 | 9.8 (0.3) | 9.8 (0.3) | 0.829 |
| Repetition (/10) | 9.2 (1.5) | 9.6 (0.7) | 0.297 | 9.9 (0.2) | 9.9 (0.1) | 0.615 |
| Naming (/10) | 8.1 (2.7) | 8.6 (2.0) | 0.330 | 9.6 (0.4) | 9.6 (0.3) | 0.490 |
| disease duration | 2.2 (2.3) | 1.4 (0.9) | 0.319 |  |  |  |
| ALSFRS, total | 39.6 (4.0) | 41.6 (2.9) | 0.075 |  |  |  |
| bulb 1-3 (/12) | 10.8 (1.6) | 11.9 (0.4) | 0.018 |  |  |  |
| motor 4-9 (/24) | 17.4 (3.6) | 18.0 (2.6) | 0.494 |  |  |  |
| resp 10-12 (/12) | 11.4 (1.1) | 11.8 (0.6) | 0.101 |  |  |  |

Data are mean (SD).

The Kruskal-Wallis test and Fisher’s exact test for variables between the two independent study groups.

**Table S4.** Comparison of demographic variables between groups in each fold (FTD and ALS vs. HC).

| fold | Age | | Gender | | Education | |
| --- | --- | --- | --- | --- | --- | --- |
| train | test | train | test | train | test |
| 1 | 0.997 | 0.080 | 0.109 | 0.349 | <0.001 | 0.160 |
| 2 | 0.275 | 0.735 | 0.080 | 0.527 | <0.001 | 0.746 |
| 3 | 0.386 | 0.910 | 0.080 | 0.516 | 0.004 | 0.015 |
| 4 | 0.686 | 0.303 | 0.110 | 0.341 | 0.002 | 0.053 |
| 5 | 0.218 | 0.573 | 0.055 | 0.751 | 0.002 | 0.057 |

Data shown are p-values.

The Kruskal-Wallis test and Fisher’s exact test were used for demographic variables between groups.

**Table S5.** The17 linguistic Features.

| **Features** | **Description** |
| --- | --- |
| Proportion of Parts of Speech (12 types) | The proportion of each part of speech in the utterance. (verbs, adjectives, adjectival verbs, nouns, adverbs, pre-nouns, conjunctions, interjections, auxiliary verbs, particles, symbols, fillers) |
| Total Number of Words (*N*) | The number of words contained in the utterance. |
| Number of Unique Words (*V (N)*) | The number of unique words, excluding duplicates, from the total 137 number of words. |
| Confidence Score | The accuracy of predictions obtained from the speech recognition system output. |
| Type-Token Ratio (TTR) | The value obtained by dividing the number of unique words by the total number of words. |
| Simpson’s D value | An index that quantitatively evaluates the richness of vocabulary in a text. |

**Table S6.** The 4 temporal features.

| **Features** | **Description** |
| --- | --- |
| reaction time | Time between monitor display and start of response. |
| speech time | Time taken to answer |
| speech speed (*N* / sec) | Number of words spoken per seconds |
| speech speed (*V(N)* / sec) | Number of Unique Words per seconds |

**Table S7.** Hyperparameter optimization settings for weak learner models.

| **model** | **parameter** | **value_search_range** | **search_method** |
| --- | --- | --- | --- |
| SVM | Kernel | rbf | GridSearchCV |
| SVM | *C* | 0.001, 0.01, 0.1, 1, 10, 100 | GridSearchCV |
| SVM | γ | 0.001, 0.01, 0.1, 1, 10, 100 | GridSearchCV |
| RandomForest | n_estimators | 1, 2, …, 20 | GridSearchCV |
| RandomForest | criterion | 'gini', 'entropy' | GridSearchCV |
| RandomForest | max_depth | 1, 2, 3, 4 | GridSearchCV |
| LightGBM | boosting_type | gbdt | Fixed |
| LightGBM | objective | binary | Fixed |
| LightGBM | learning_rate | 0.1 | Fixed |
| LightGBM | metric | binary_logloss | Fixed |
| LightGBM | max_depth | 7 | Fixed |
| LightGBM | n_estimators | 1000 | Fixed |
| LightGBM | early_stopping_rounds | 10 | Fixed |
| LightGBM | importance_type | gain | Fixed |
| LightGBM | reg_alpha | 0.0001 ~ 0.01 | Optuna |
| LightGBM | reg_lambda | 0.0001 ~ 0.1 | Optuna |
| LightGBM | num_leaves | 2,3, ..., 8 | Optuna |
| LightGBM | min_data_in_leaf | 10 ~ 20 | Optuna |
| LightGBM | colsample_bytree | 0 ~ 1 | Optuna |
| LightGBM | subsample | 0.7 ~ 0.9 | Optuna |
| LightGBM | subsample_freq | 4 ~ 8 | Optuna |
| LightGBM | min_child_samples | 1 ~ 7 | Optuna |
| LightGBM | feature_fraction | 0.6 ~ 0.8 | Optuna |

SVM, Support Vector Machine
